# Supplementary material for: Targeting LSD1 suppresses stem cell-like properties and sensitizes head and neck squamous cell carcinoma to PD-1 blockade
Source: PubMed Central journal article supplement (PMC8542042; doi:10.1038/s41419-021-04297-0), 2021-10-23

# Supply Figure 1

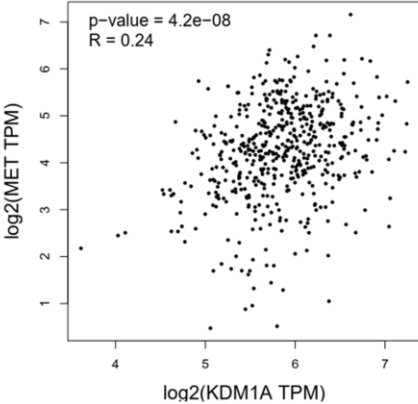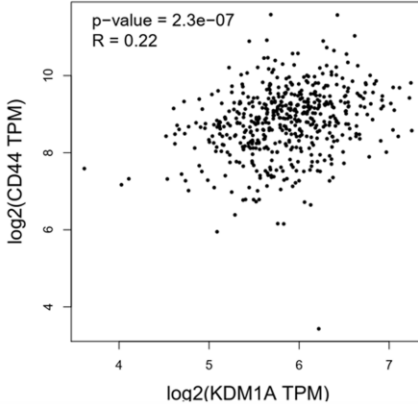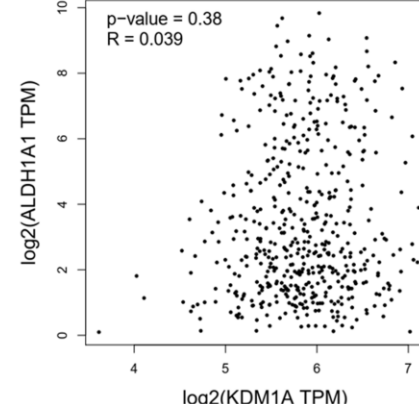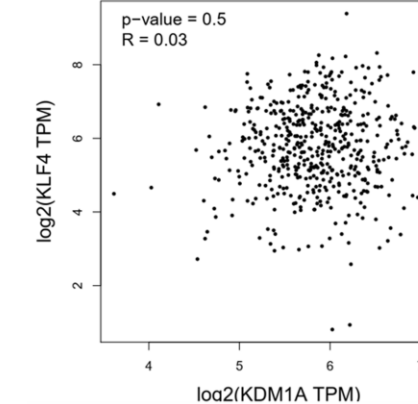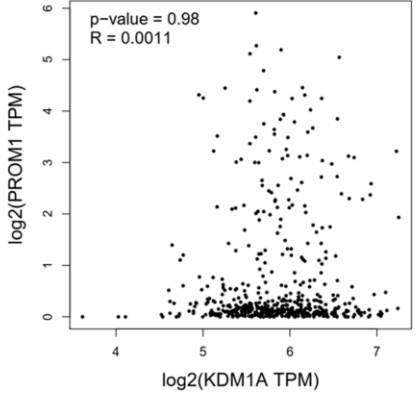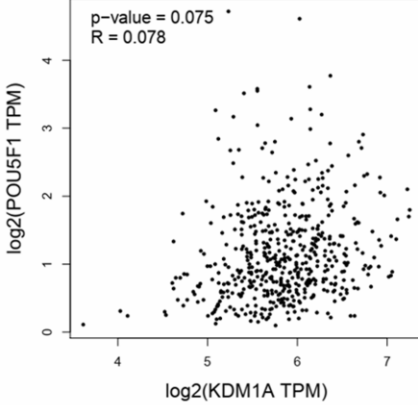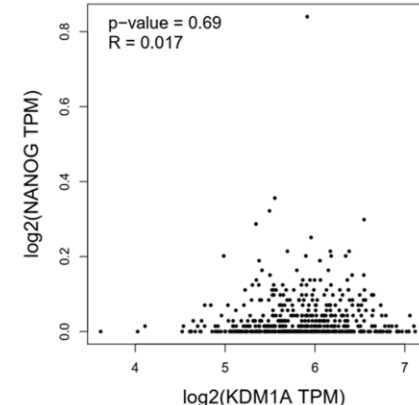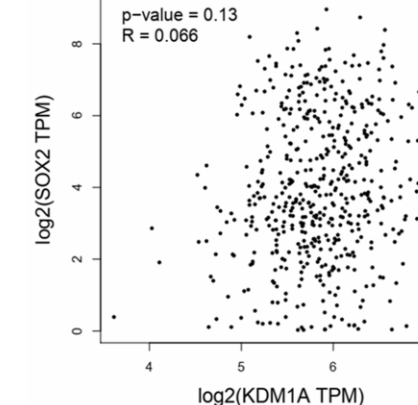

Supply Figure 2

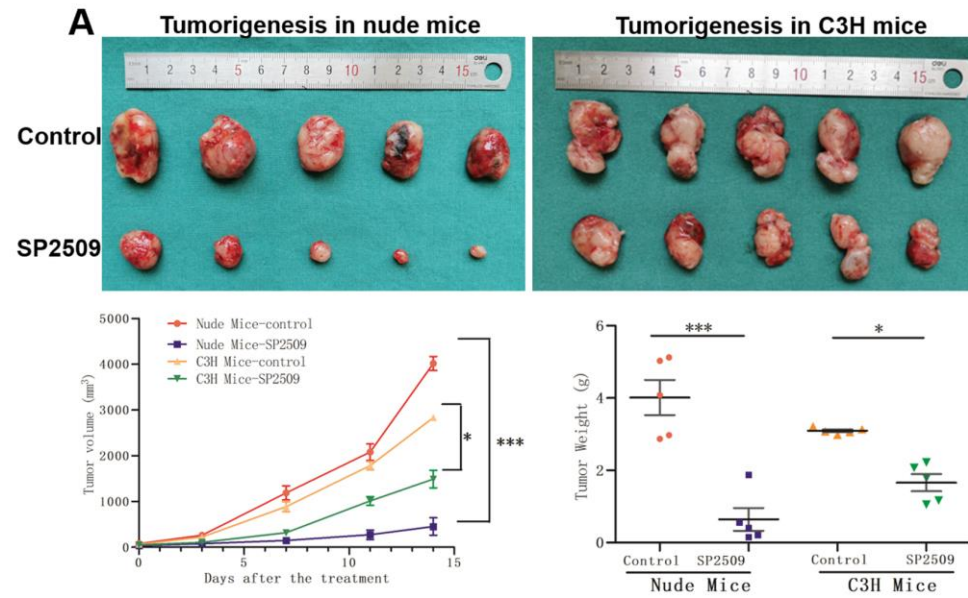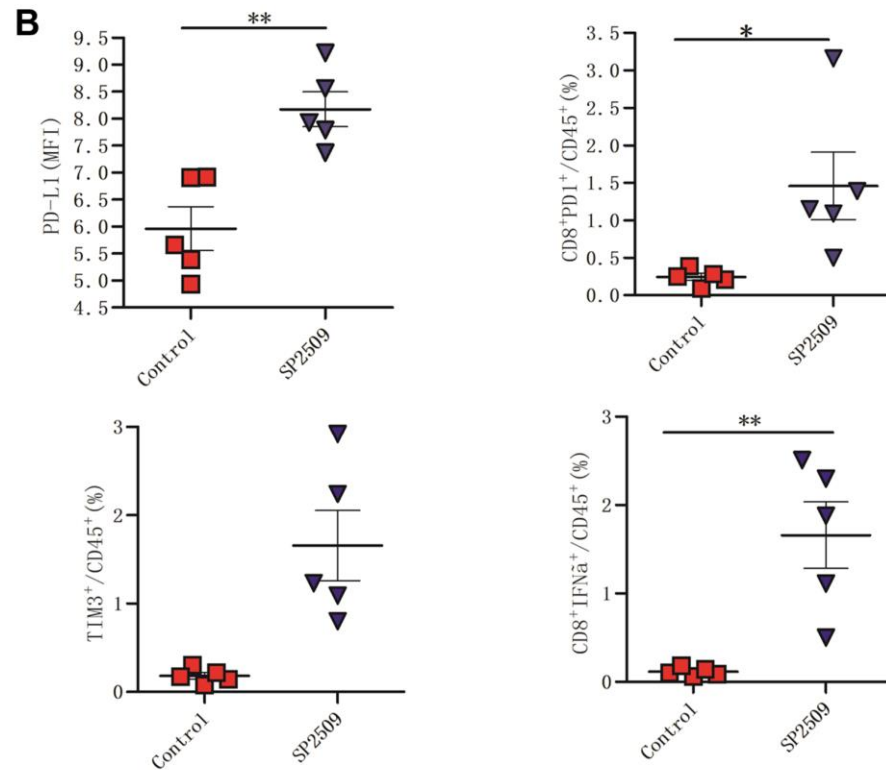

Supply Figure 3

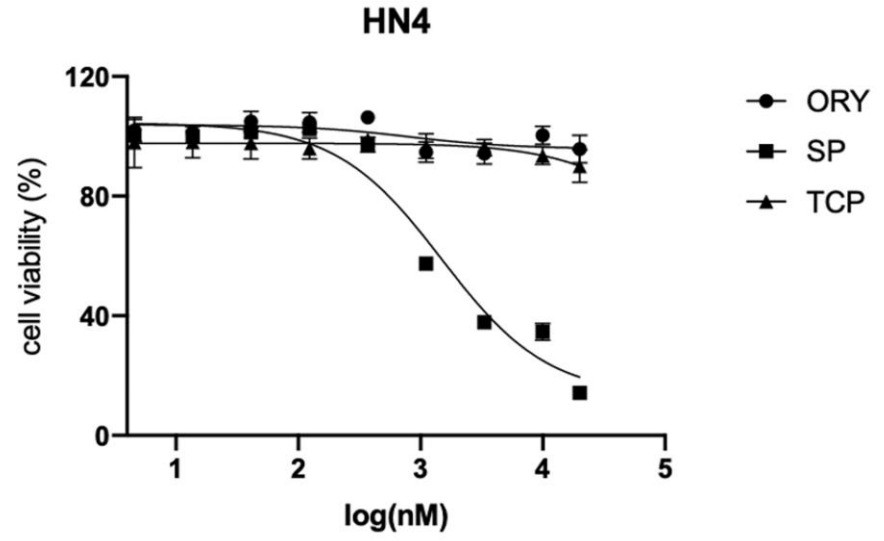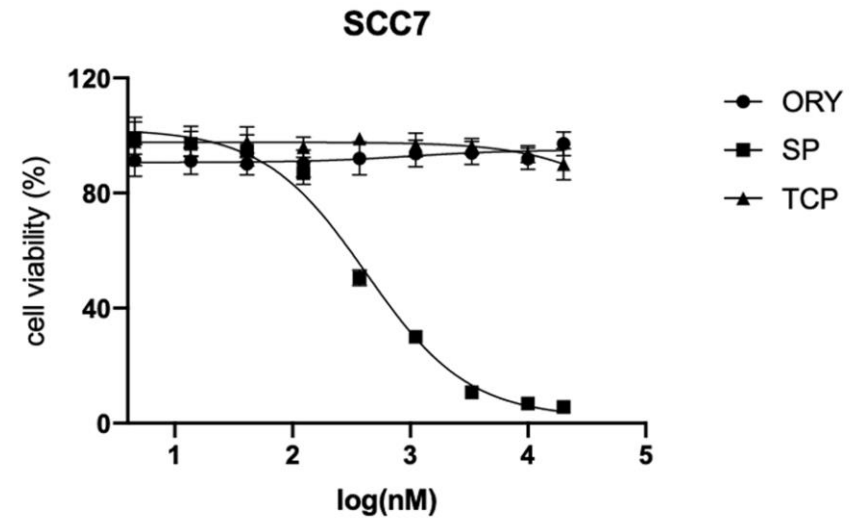

Supply Figure 4

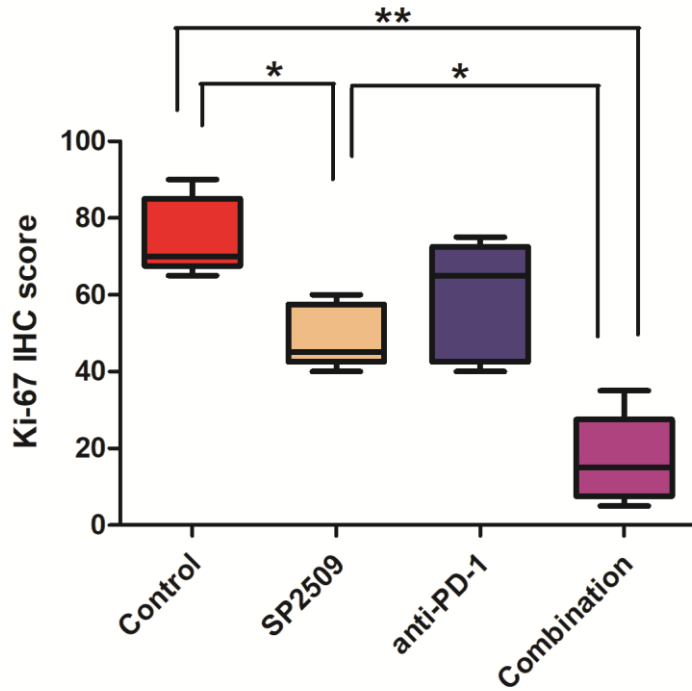

# Supply Figure 5

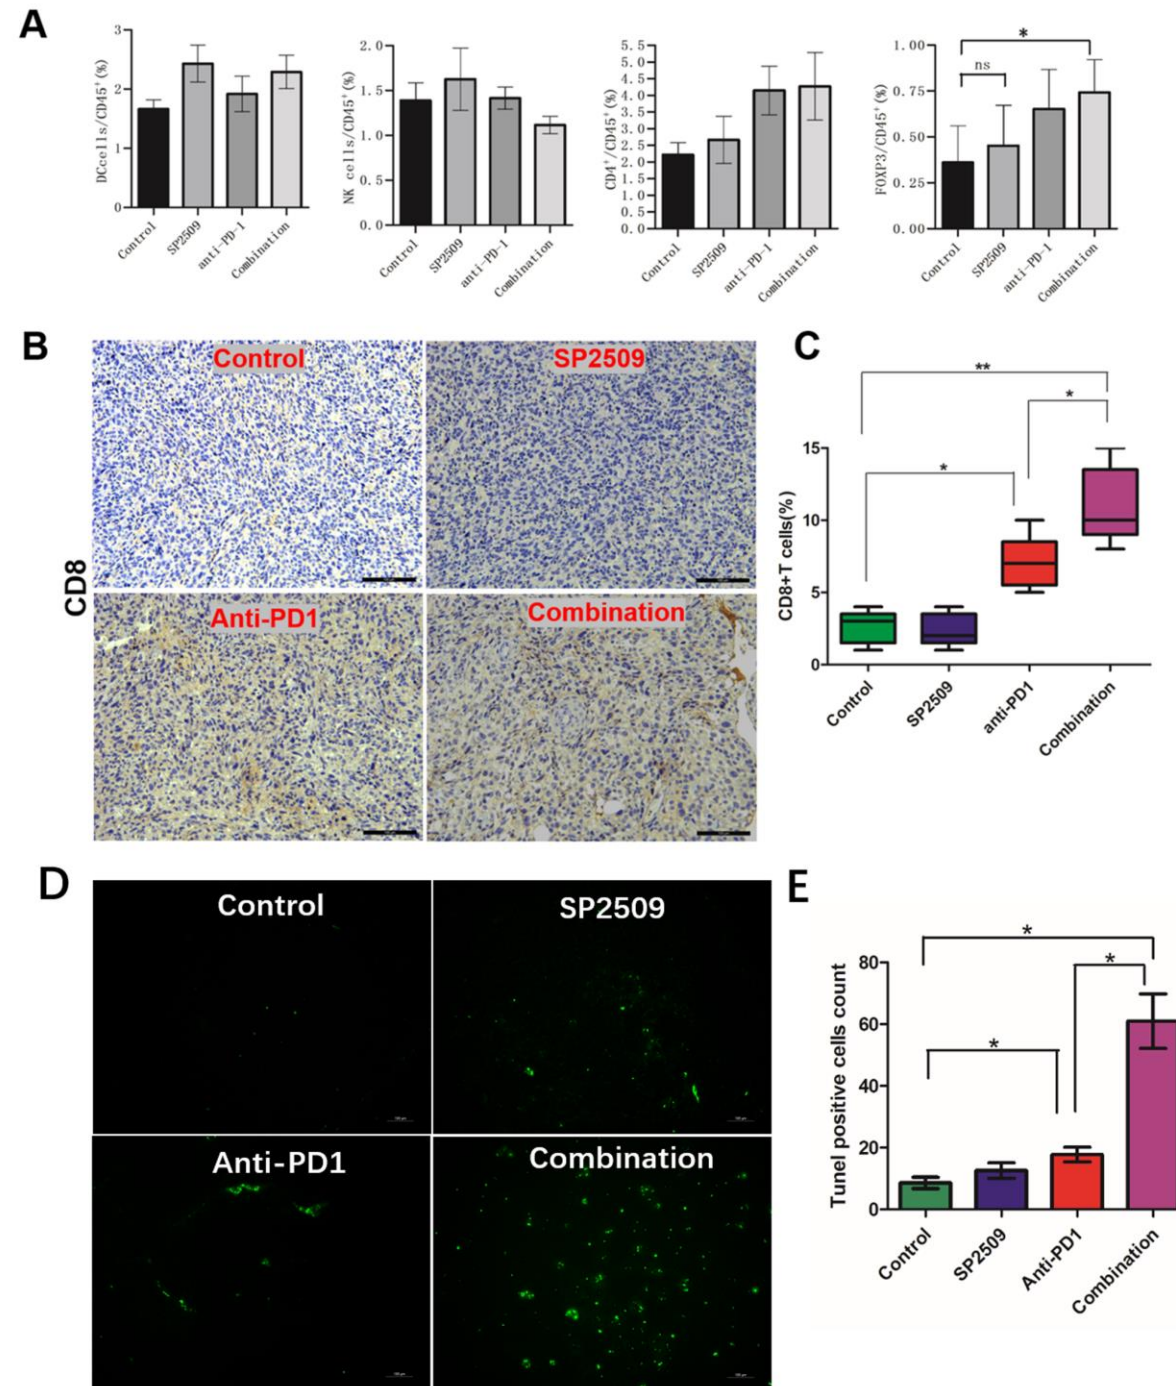

Supplement: 41419_2021_4297_MOESM1_ESM.pdf [file 41419_2021_4297_MOESM1_ESM.pdf]
